# Supplementary material for: Analysis of the BarA/UvrY Two-Component System in Shewanella oneidensis MR-1
Source: PLOS journal article supplement (doi:10.1371/journal.pone.0023440), 2011-09-12
Supplement: S4 (10.1371/journal.pone.0023440.s004) [file journal.pone.0023440.s004]

**A**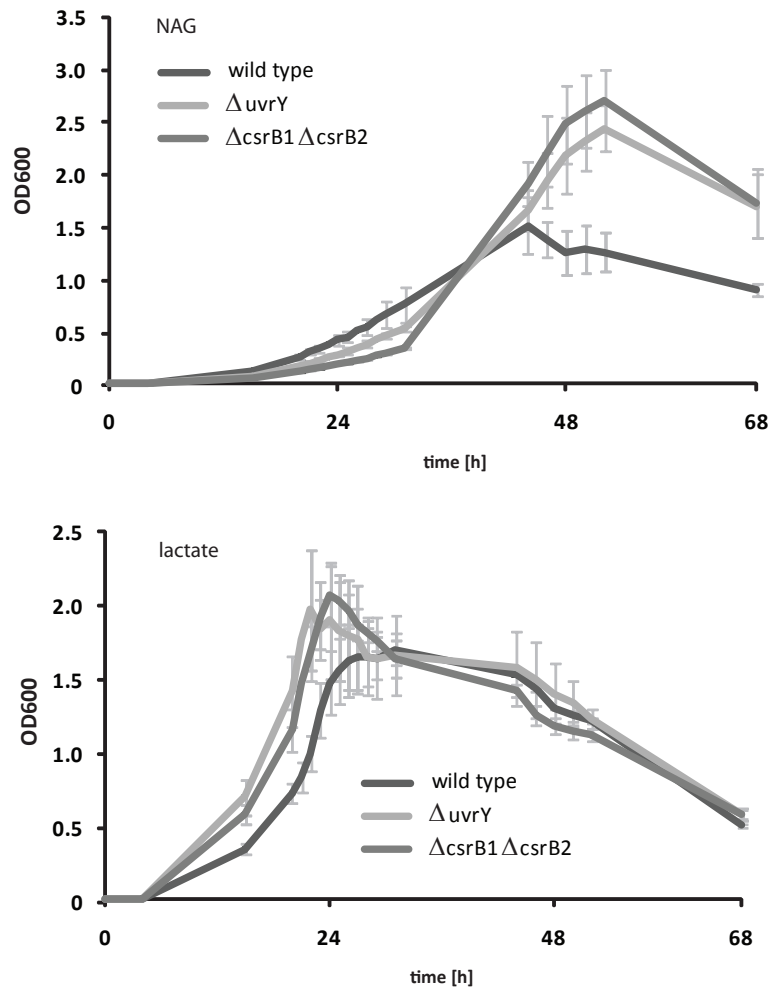**B**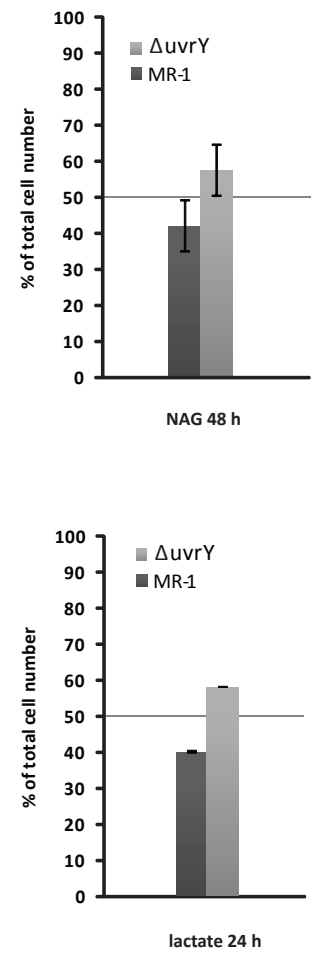

**Figure S4: A) Growth comparison of *S. oneidensis* wild type,  $\Delta uvrY$ , and  $\Delta csrB1\Delta csrB2$  mutants.** Displayed is growth under aerobic conditions with N-acetylglucosamine (NAG) as carbon source (upper panel) or lactate (lower panel). The corresponding strains are indicated. In order to better highlight the differences in growth behavior, growth was plotted at a linear scale. The error bars display the standard deviation. **B) Ratio of  $\Delta uvrY$  and wild-type cells grown in mixed cultures.** To distinguish the two strains, one of the strains was constitutively expressing *gfp*.
